# Supplementary material
Source: PubMed Central journal article supplement (PMC4830495)
Supplement: NIHMS769139-supplement-supplemental_materials.pdf [file NIHMS769139-supplement-supplemental_materials.pdf]

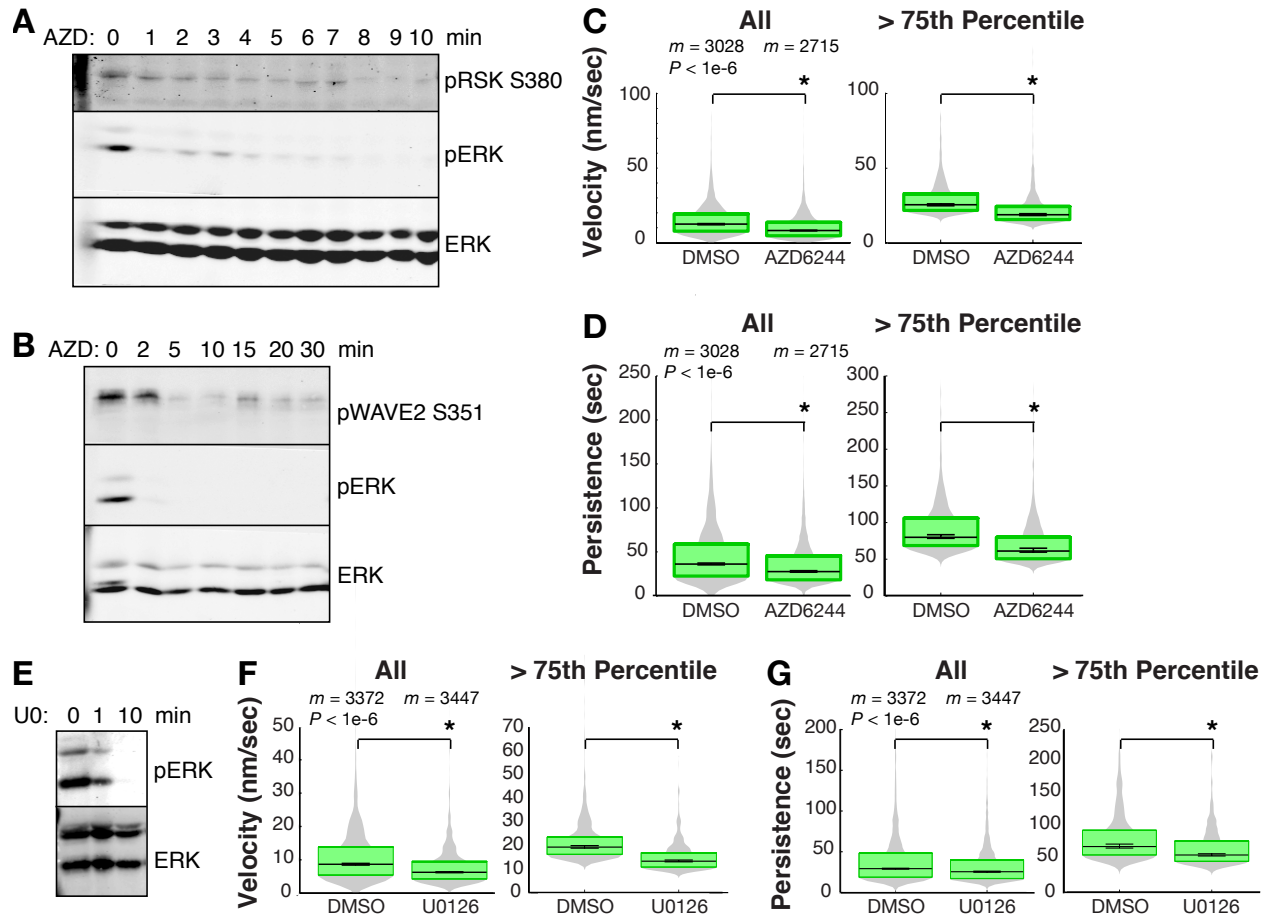

**Figure S1.** ERK inhibition in PtK1 cells.

(A) and (B) Representative Western blots (repeated 5 and 3 times, respectively) of ERK-mediated phosphorylation in PtK1 cells after treatment with AZD6244. (C) Average protrusion velocity and (D) persistence in cells treated with DMSO and AZD6244 for 10-20 min. The “> 75<sup>th</sup> Percentile” graphs plot the distribution of the top 25% of events in the “All” graphs.  $m$  is number of events from  $n = 5$  cells for each condition tracked in 3-4 independent experiments. Error bars about the median indicate 95% confidence interval estimated from bootstrapped data. Statistical significance calculated with the permutation test. (E) Representative Western blot (repeated 2 times) of ERK-mediated phosphorylation in PtK1 cells after treatment with U0126. (F) Average protrusion velocity and (G) persistence in cells treated with DMSO and U0126 for

10-20 min.  $m$  is number of events from  $n = 5$  control and  $n = 4$  U0126-treated cells tracked in 2 independent experiments. For further description of the box plots see Fig. 1.

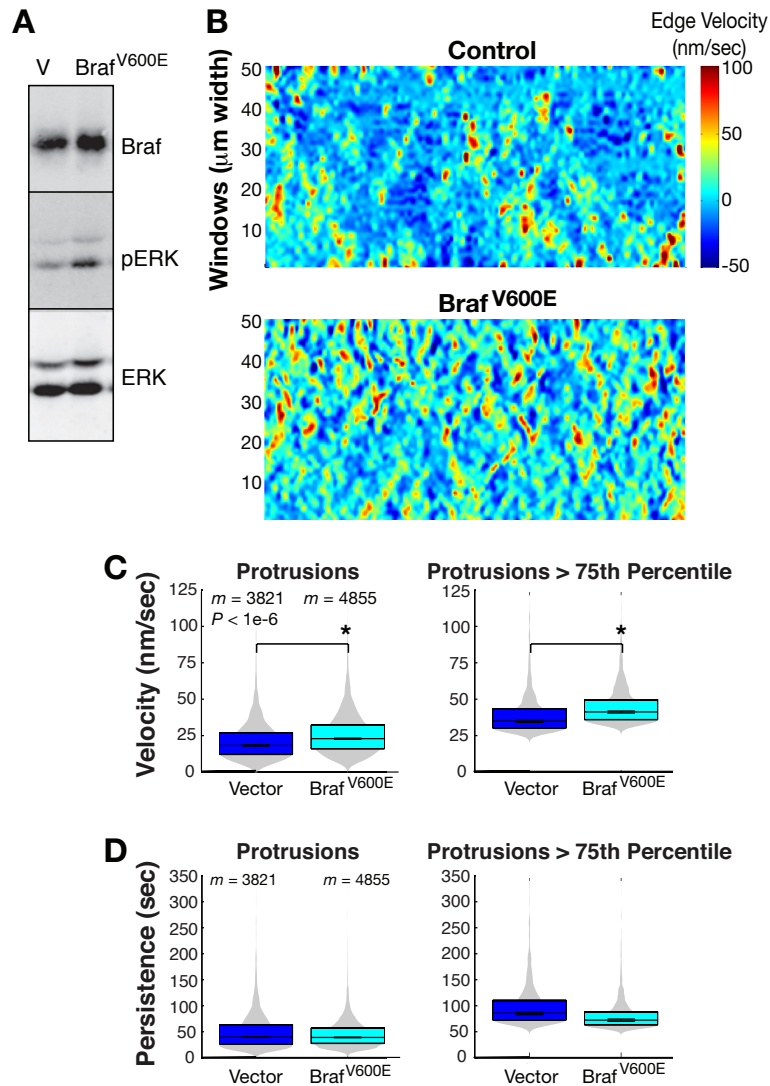

**Figure S2.** ERK hyperactivation induces protrusion velocity.

(A) Representative Western blot indicating Braf expression and ERK activity of PtK1 cells stably expressing empty vector (V) or Braf<sup>V600E</sup> (repeated 3 times.) (B) Protrusion maps of edge dynamics in representative stable PtK1 transfectants (representative of 8 cells from 2 independent experiments). (C) Average velocity and (D) persistence time of protrusions in PtK1

cells expressing Vector or Braf<sup>V600E</sup>. The “> 75<sup>th</sup> Percentile” graphs plot the distribution of the top 25% of events in the “All” graphs. *m* is number of events from *n* = 8 cells for each condition tracked in 2 independent experiments. Error bars about the median are the 95% confidence interval calculated from bootstrapped data. Statistical significance was calculated with the permutation test. For further description of the box plots see Fig. 1.

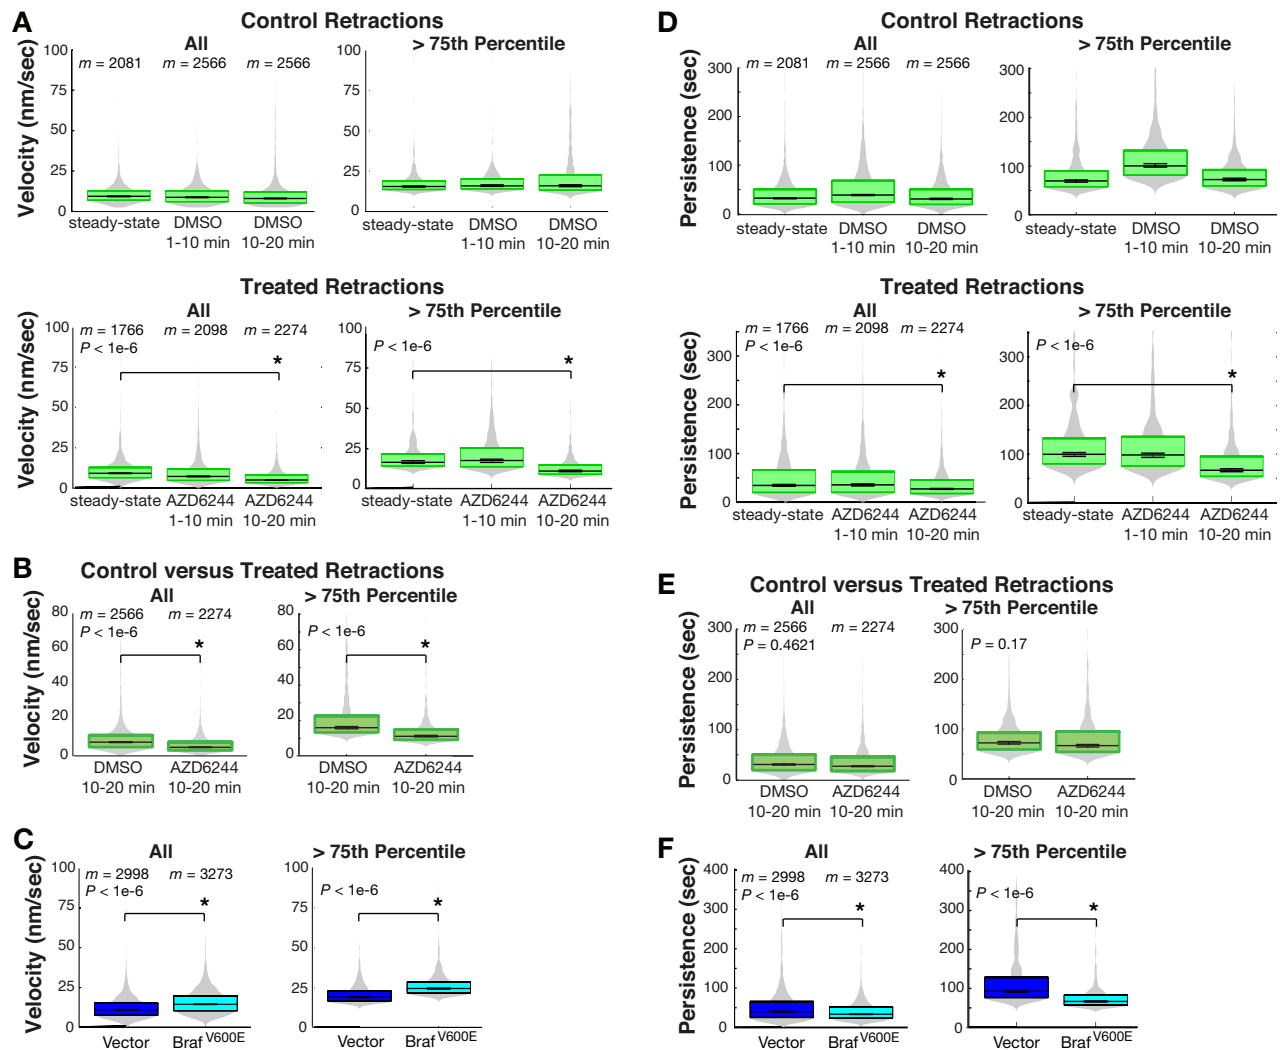

**Figure S3.** ERK increases retraction velocity.

(A), (B) Average retraction velocity in PtK1 cells treated with DMSO and AZD6244 and (C) expressing Vector and Braf<sup>V600E</sup>. (D), (E) Average retraction persistence time in PtK1 cells treated with DMSO and AZD6244 and (F) expressing Vector and Braf<sup>V600E</sup>. The “> 75<sup>th</sup> Percentile” graphs plot the distribution of the top 25% of events in the “All” graphs.  $m$  is number of events from  $n = 5$  DMSO- or AZD6244-treated cells and  $n = 8$  vector- or Braf<sup>V600E</sup>-expressing cells tracked in 3-4 independent experiments. Error bars about the mean indicate 95% confidence interval calculated from bootstrapped data. Statistical significance was calculated with the permutation test. For further description of the box plots see Fig. 1.

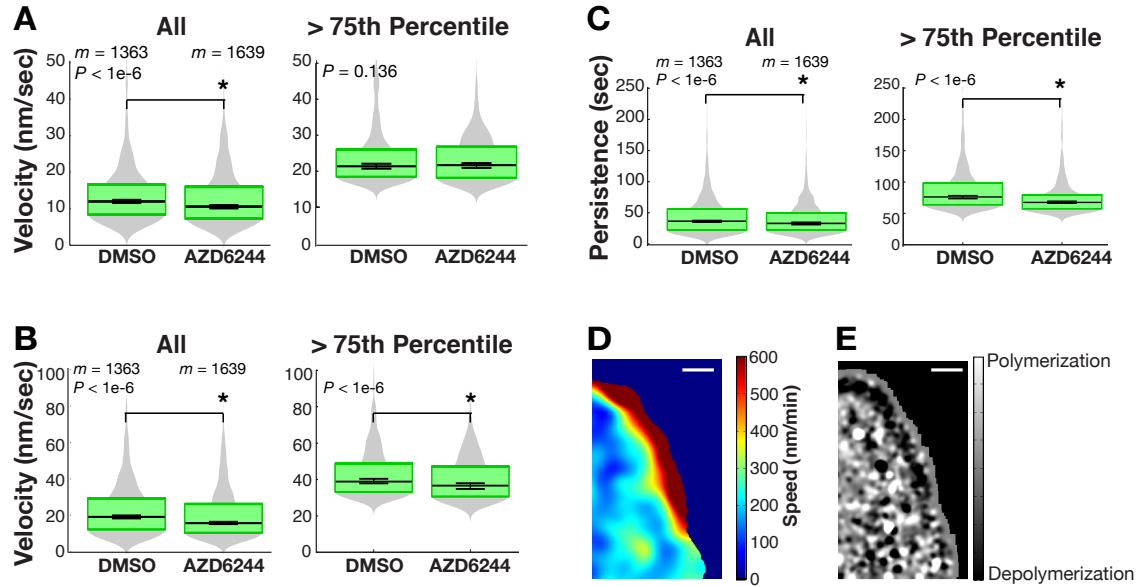

**Figure S4.** ERK promotes peak membrane protrusion velocity and persistence time in PtK1 cells microinjected with Alexa-568 actin monomers.

(A) Average protrusion velocity, (B) maximum protrusion velocity, and (C) persistence time in cells microinjected with Alexa-568 actin.  $m$  is number of events from  $n = 7$  microinjected and DMSO-treated cells and  $n = 6$  microinjected and AZD6244-treated (10-20 min) cells tracked in 4 independent experiments. The “> 75<sup>th</sup> Percentile” graphs plot the distribution of the top 25% of events in the “All” graphs. For further description of the box plots see Fig. 1. (D) Steady-state actin flow rates (temporally averaged over 1.5 min) and (E) actin polymer turnover (temporally averaged over 9 min; white indicates polymerization and black de-polymerization) for a representative cell before treatment. Images are representative of 4 DMSO-treated cells tracked in 4 independent experiments. Scale bars, 5  $\mu$ M.

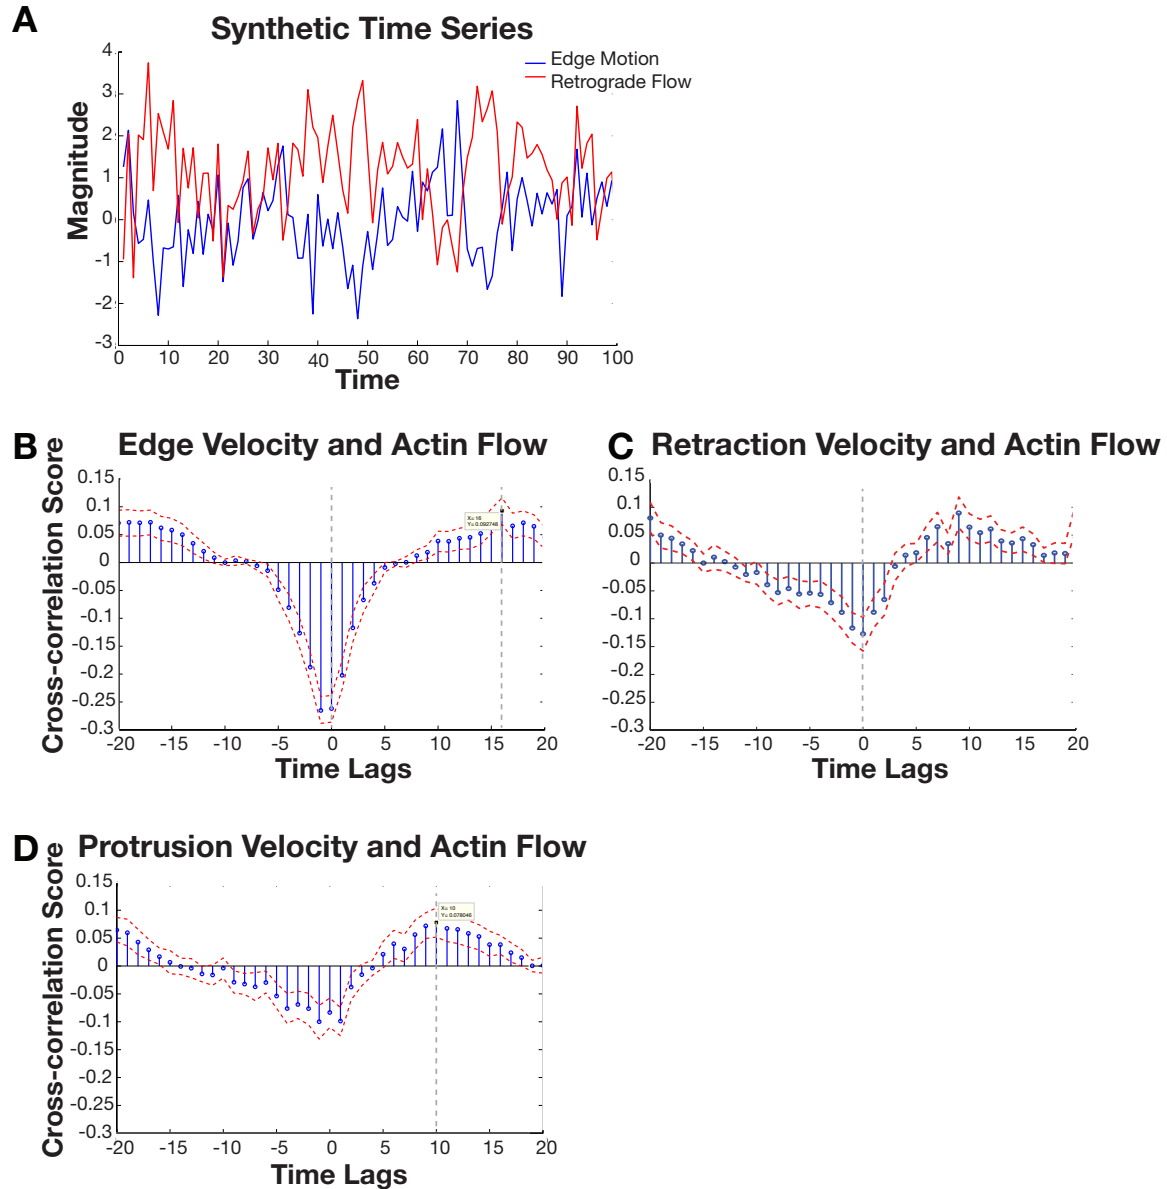

**Figure S5.** Simulation of cross-correlation of actin retrograde flow with cell edge velocity.

(A) Synthetic time series for edge motion and retrograde flow variables, generated using a sawtooth wave form. (B) Cross-correlation of all edge motion and actin flow and (C) edge motion specifically during retraction and (D) protrusion events show a time lag shift from 16 to 10 (arbitrary units) when the retraction component of the edge motion is extracted.

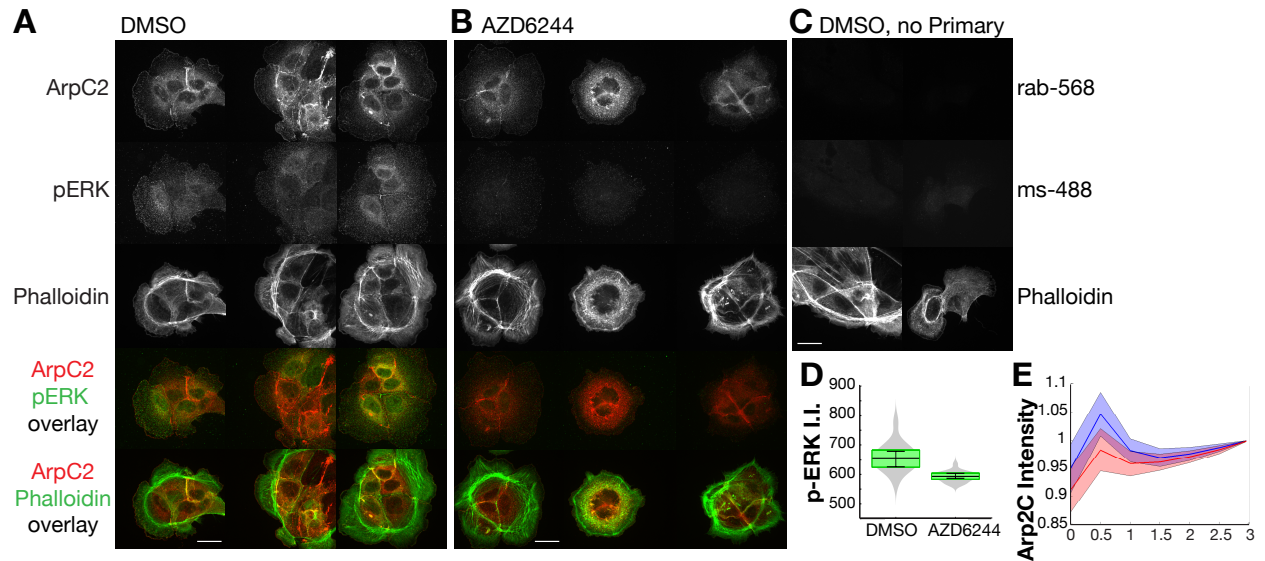

**Figure S6.** ERK regulates Arp2/3 localization to the cell edge.

Representative immunofluorescence images of phosphorylated ERK in steady-state PtK1 cells treated with (A) DMSO or (B) the MEK inhibitor AZD6244. (C) Staining of DMSO-treated PtK1 cells with secondary antibodies only. Scale bar, 20  $\mu\text{m}$ . (D) Mean area integrated intensity of phosphorylated ERK in cells treated with DMSO ( $n = 18$  cells) or MEK inhibitor ( $n = 17$  cells) imaged in 3 independent experiments. (E) Mean Arp2C intensity in cells treated with DMSO (blue,  $n = 18$  cells) or MEK inhibitor (red,  $n = 17$  cells) imaged in 2 independent experiments. Shaded areas indicate 95% C.I.

**Control cells**

|                  | Protrusion Median Velocity |          |           | Protrusion Maximum Velocity |          |           | Protrusion Persistence Time |          |           |
|------------------|----------------------------|----------|-----------|-----------------------------|----------|-----------|-----------------------------|----------|-----------|
|                  | steady-state               | 1-10 min | 10-20 min | steady-state                | 1-10 min | 10-20 min | steady-state                | 1-10 min | 10-20 min |
| mean             | 14.8                       | 12.9     | 12.4      | 25.2                        | 19.5     | 20.0      | 38.2                        | 29.9     | 36.2      |
| up CI            | 14.5                       | 12.5     | 12.0      | 24.0                        | 18.7     | 19.5      | 37.4                        | 29.2     | 35.2      |
| down CI          | 15.3                       | 13.2     | 12.8      | 26.0                        | 20.4     | 21.0      | 39.1                        | 30.6     | 37.3      |
| 25 percentile    | 9.7                        | 8.1      | 7.7       | 14.5                        | 11.3     | 12.0      | 24.7                        | 19.2     | 22.5      |
| 75 percentile    | 22.2                       | 20.0     | 19.3      | 41.2                        | 33.4     | 34.9      | 60.0                        | 49.0     | 58.6      |
| min              | 0.9                        | 1.1      | 1.0       | 1.3                         | 1.4      | 1.7       | 2.4                         | 4.0      | 2.9       |
| max              | 132.1                      | 108.2    | 100.0     | 147.1                       | 130.1    | 131.4     | 366.9                       | 238.2    | 346.5     |
| Permutation test |                            |          | *         |                             |          | *         |                             |          | equal     |

**AZD6244-treated cells**

|                  | Protrusion Median Velocity |          |           | Protrusion Maximum Velocity |          |           | Protrusion Persistence Time |          |           |
|------------------|----------------------------|----------|-----------|-----------------------------|----------|-----------|-----------------------------|----------|-----------|
|                  | steady-state               | 1-10 min | 10-20 min | steady-state                | 1-10 min | 10-20 min | steady-state                | 1-10 min | 10-20 min |
| mean             | 15.5                       | 11.0     | 8.1       | 25.8                        | 16.7     | 12.0      | 35.1                        | 28.4     | 27.6      |
| up CI            | 15.0                       | 10.4     | 7.9       | 24.9                        | 16.1     | 11.6      | 33.0                        | 27.9     | 26.9      |
| down CI          | 16.1                       | 11.5     | 8.4       | 26.8                        | 17.7     | 12.6      | 36.4                        | 29.1     | 28.4      |
| 25 percentile    | 9.7                        | 6.3      | 4.6       | 14.3                        | 8.4      | 6.3       | 20.1                        | 18.2     | 18.2      |
| 75 percentile    | 23.7                       | 19.2     | 13.6      | 41.8                        | 31.4     | 21.8      | 56.1                        | 46.6     | 45.5      |
| min              | 0.7                        | 0.9      | 0.8       | 1.2                         | 1.4      | 1.5       | 1.4                         | 4.0      | 3.0       |
| max              | 208.9                      | 182.3    | 167.3     | 214.7                       | 182.3    | 167.3     | 471.0                       | 234.4    | 396.3     |
| Permutation test |                            |          | *         |                             |          | *         |                             |          | *         |

**Control cells - 75th Percentile**

|                  | Protrusion Median Velocity |          |           | Protrusion Maximum Velocity |          |           | Protrusion Persistence Time |          |           |
|------------------|----------------------------|----------|-----------|-----------------------------|----------|-----------|-----------------------------|----------|-----------|
|                  | steady-state               | 1-10 min | 10-20 min | steady-state                | 1-10 min | 10-20 min | steady-state                | 1-10 min | 10-20 min |
| mean             | 27.8                       | 27.1     | 25.6      | 54.4                        | 47.7     | 47.0      | 82.1                        | 68.2     | 79.9      |
| up CI            | 27.3                       | 26.3     | 24.9      | 53.2                        | 46.5     | 45.7      | 79.7                        | 66.1     | 78.8      |
| down CI          | 28.6                       | 28.0     | 26.2      | 55.8                        | 49.6     | 48.5      | 85.1                        | 69.9     | 83.7      |
| 25 percentile    | 24.5                       | 22.9     | 21.8      | 46.8                        | 39.3     | 40.3      | 69.4                        | 56.9     | 68.6      |
| 75 percentile    | 33.4                       | 33.0     | 32.9      | 67.0                        | 61.9     | 58.3      | 107.1                       | 92.2     | 106.0     |
| min              | 22.2                       | 20.0     | 19.3      | 41.2                        | 33.4     | 34.9      | 60.0                        | 49.0     | 58.6      |
| max              | 132.1                      | 108.2    | 100.0     | 147.1                       | 130.1    | 131.4     | 366.9                       | 238.2    | 346.5     |
| Permutation test |                            |          | *         |                             |          | *         |                             |          | equal     |

**AZD6244-treated cells-75th Percentile**

|                  | Protrusion Median Velocity |          |           | Protrusion Maximum Velocity |          |           | Protrusion Persistence Time |          |           |
|------------------|----------------------------|----------|-----------|-----------------------------|----------|-----------|-----------------------------|----------|-----------|
|                  | steady-state               | 1-10 min | 10-20 min | steady-state                | 1-10 min | 10-20 min | steady-state                | 1-10 min | 10-20 min |
| mean             | 31.8                       | 27.1     | 18.9      | 57.7                        | 48.3     | 32.2      | 77.9                        | 66.7     | 61.1      |
| up CI            | 31.1                       | 26.3     | 18.3      | 56.0                        | 45.8     | 31.2      | 74.8                        | 63.4     | 59.6      |
| down CI          | 32.8                       | 28.0     | 19.7      | 59.5                        | 50.1     | 33.4      | 80.4                        | 68.6     | 65.2      |
| 25 percentile    | 26.7                       | 22.2     | 15.6      | 48.6                        | 38.0     | 25.9      | 64.8                        | 53.0     | 50.7      |
| 75 percentile    | 39.9                       | 36.4     | 24.4      | 73.9                        | 65.3     | 43.1      | 108.4                       | 90.7     | 80.0      |
| min              | 23.7                       | 19.2     | 13.6      | 41.8                        | 31.4     | 21.8      | 56.1                        | 46.6     | 45.5      |
| max              | 208.9                      | 182.3    | 167.3     | 214.7                       | 182.3    | 167.3     | 471.0                       | 234.4    | 396.3     |
| Permutation test |                            |          | *         |                             |          | *         |                             |          | *         |



**Control cells**

|                  | Retraction Median Velocity |          |           | Retraction Maximum Velocity |          |           | Retraction Persistence Time |          |           |
|------------------|----------------------------|----------|-----------|-----------------------------|----------|-----------|-----------------------------|----------|-----------|
|                  | steady-state               | 1-10 min | 10-20 min | steady-state                | 1-10 min | 10-20 min | steady-state                | 1-10 min | 10-20 min |
| mean             | 9.3                        | 8.7      | 7.9       | 13.4                        | 13.1     | 11.5      | 32.5                        | 38.8     | 30.9      |
| up CI            | 9.0                        | 8.5      | 7.7       | 13.1                        | 12.8     | 11.0      | 30.9                        | 37.6     | 29.7      |
| down CI          | 9.5                        | 8.9      | 8.2       | 13.8                        | 13.4     | 11.8      | 33.6                        | 39.8     | 32.0      |
| 25 percentile    | 6.9                        | 6.0      | 5.1       | 10.0                        | 8.9      | 7.9       | 20.5                        | 24.1     | 19.5      |
| 75 percentile    | 12.5                       | 12.6     | 11.9      | 18.5                        | 19.8     | 17.5      | 50.3                        | 68.8     | 50.3      |
| min              | 0.9                        | 1.0      | 1.0       | 1.6                         | 1.4      | 1.8       | 1.8                         | 1.6      | 1.6       |
| max              | 92.4                       | 92.2     | 81.4      | 92.4                        | 110.9    | 81.4      | 280.0                       | 330.0    | 247.3     |
| Permutation test | equal                      |          |           | equal                       |          |           | equal                       |          |           |

**AZD6244-treated cells**

|                  | Retraction Median Velocity |          |           | Retraction Maximum Velocity |          |           | Retraction Persistence Time |          |           |
|------------------|----------------------------|----------|-----------|-----------------------------|----------|-----------|-----------------------------|----------|-----------|
|                  | steady-state               | 1-10 min | 10-20 min | steady-state                | 1-10 min | 10-20 min | steady-state                | 1-10 min | 10-20 min |
| mean             | 9.2                        | 7.2      | 5.0       | 13.9                        | 11.2     | 7.4       | 34.6                        | 35.7     | 27.4      |
| up CI            | 9.0                        | 6.9      | 4.9       | 13.4                        | 10.9     | 7.2       | 32.7                        | 33.6     | 26.4      |
| down CI          | 9.4                        | 7.5      | 5.2       | 14.3                        | 11.7     | 7.6       | 36.7                        | 37.6     | 28.2      |
| 25 percentile    | 6.4                        | 4.8      | 3.4       | 9.9                         | 7.2      | 4.8       | 20.1                        | 20.4     | 17.9      |
| 75 percentile    | 12.8                       | 11.8     | 8.0       | 19.7                        | 18.1     | 10.9      | 65.7                        | 63.0     | 46.0      |
| min              | 1.0                        | 0.8      | 0.7       | 1.3                         | 1.3      | 1.3       | 1.5                         | 4.1      | 3.3       |
| max              | 133.4                      | 77.7     | 78.2      | 133.4                       | 192.0    | 82.8      | 460.0                       | 410.0    | 420.9     |
| Permutation test | *                          |          |           | *                           |          |           | *                           |          |           |

**Control cells - 75th Percentile**

|                  | Retraction Median Velocity |          |           | Retraction Maximum Velocity |          |           | Retraction Persistence Time |          |           |
|------------------|----------------------------|----------|-----------|-----------------------------|----------|-----------|-----------------------------|----------|-----------|
|                  | steady-state               | 1-10 min | 10-20 min | steady-state                | 1-10 min | 10-20 min | steady-state                | 1-10 min | 10-20 min |
| mean             | 15.5                       | 15.9     | 16.0      | 22.9                        | 26.8     | 24.4      | 69.6                        | 100.5    | 72.5      |
| up CI            | 15.2                       | 15.6     | 15.4      | 22.4                        | 26.3     | 23.5      | 67.4                        | 98.7     | 70.0      |
| down CI          | 15.9                       | 16.6     | 16.7      | 23.4                        | 27.8     | 25.3      | 71.7                        | 105.3    | 75.2      |
| 25 percentile    | 13.7                       | 14.0     | 13.3      | 20.2                        | 22.6     | 20.3      | 57.5                        | 81.4     | 59.3      |
| 75 percentile    | 19.0                       | 20.2     | 22.6      | 27.6                        | 34.3     | 34.2      | 89.5                        | 132.0    | 92.8      |
| min              | 12.5                       | 12.6     | 11.9      | 18.5                        | 19.8     | 17.5      | 50.3                        | 68.8     | 50.4      |
| max              | 92.4                       | 92.2     | 81.4      | 92.4                        | 110.9    | 81.4      | 280.0                       | 330.0    | 247.3     |
| Permutation test | equal                      |          |           | equal                       |          |           | equal                       |          |           |

**AZD6244-treated cells-75th Percentile**

|                  | Retraction Median Velocity |          |           | Retraction Maximum Velocity |          |           | Retraction Persistence Time |          |           |
|------------------|----------------------------|----------|-----------|-----------------------------|----------|-----------|-----------------------------|----------|-----------|
|                  | steady-state               | 1-10 min | 10-20 min | steady-state                | 1-10 min | 10-20 min | steady-state                | 1-10 min | 10-20 min |
| mean             | 16.6                       | 17.7     | 11.1      | 26.2                        | 27.7     | 15.3      | 99.7                        | 98.4     | 67.0      |
| up CI            | 15.9                       | 16.5     | 10.7      | 25.0                        | 26.4     | 14.7      | 95.7                        | 92.6     | 64.1      |
| down CI          | 17.5                       | 18.4     | 11.7      | 27.0                        | 29.7     | 15.8      | 102.6                       | 102.0    | 69.2      |
| 25 percentile    | 14.2                       | 13.8     | 9.2       | 22.0                        | 21.6     | 12.6      | 80.1                        | 75.7     | 54.4      |
| 75 percentile    | 21.6                       | 25.3     | 15.0      | 32.0                        | 44.2     | 20.4      | 132.4                       | 136.1    | 95.2      |
| min              | 12.8                       | 11.8     | 8.0       | 19.7                        | 18.1     | 10.9      | 65.7                        | 63.0     | 46.0      |
| max              | 133.4                      | 77.7     | 78.2      | 133.4                       | 192.0    | 82.8      | 460.0                       | 410.0    | 420.9     |
| Permutation test | *                          |          |           | *                           |          |           | *                           |          |           |

**Table S1.** Event velocity averages.

Mean and median protrusion/retraction rates and durations for PtK1-Lifeact cells. \* *p* value between steady-state and 10-20 min time point is  $< 1e-6$  according to the permutation test on the distributions of the mean velocities and persistence time.

**Movie S1.** Spontaneous protrusion/retraction cycles.

PtK1 cells expressing Emerald-Lifeact. 10 sec frame rate for 30 min. Cells were treated with DMSO at 10 min of imaging, when the brightness was increased.

**Movie S2.** MEK inhibition dampens spontaneous edge motion.

PtK1 cells expressing Emerald-Lifeact as in Supplementary Movie 1. Cells were treated with AZD6244 at 10 min of imaging, when the brightness was increased.

**Movie S3.** Edge motion analysis.

Protrusion and retraction vectors from edge motion calculations of cell in Supplementary Movie 1. Vector length indicates velocity intensity.

**Movie S4.** Analysis of spontaneous edge motion upon MEK inhibition.

Protrusion calculations for cell in Supplementary Movie 2. Vector length indicates velocity intensity; scale bar for vectors, 1  $\mu\text{m}/\text{min}$ .

**Movie S5.** Actin speckles.

Alexa568-actin in PtK1 cells treated with DMSO for 10 min.

**Movie S6.** Actin speckles with MEK inhibition.

Alexa568-actin in PtK1 cells treated with AZD6244 for 10 min.

**Movie S7.** Flow tracking.

Interpolated vectors from qFSM flow analysis of Supplementary Movie 5. Flow vectors are temporally averaged over 9 frames (90 sec) and have correlation length of 2 microns. Vector color and length indicate flow rate; scale bar for vectors, 1  $\mu\text{m}/\text{min}$ , redder color is fastest.

**Movie S8.** Actin flow under MEK inhibition. Interpolated flow vectors from qFSM flow analysis of Supplementary Movie 6. Flow vectors are temporally averaged over 9 frames (90 sec) and have correlation length of 2 microns. Vector color and length indicate flow rate; scale bar for vectors, 1  $\mu\text{m}/\text{min}$ , redder color is fastest.
